# Supplementary material
Source: PubMed Central journal article supplement (PMC2917110)
Supplement: NIHMS222276-supplement-1_si_001.pdf [file NIHMS222276-supplement-1_si_001.pdf]

# Supporting Information

## Nanoscale Morphology, Dimensional Control and Electrical Properties of Oligoanilines

*Yue Wang<sup>1</sup>, Henry D. Tran<sup>2</sup>, Lei Liao<sup>1</sup>, Xiangfeng Duan<sup>1</sup> and Richard B. Kaner\*<sup>1</sup>*

1. Department of Chemistry and Biochemistry and California NanoSystems Institute, University of California, Los Angeles, California, 90095-1969

2. Fibron Technologies, Inc., Inglewood, California, 90301-2068

**Table S1.** Common Abbreviations and Molecular Structures for Aniline Oligomers and Detailed Conditions for Their Nanostructure Formation.

| Oligomer                                                                  | Common abbreviation        | Molecular structure                                                                 | Conditions for nanostructure formation |                                               |                 |                  |                            |
|---------------------------------------------------------------------------|----------------------------|-------------------------------------------------------------------------------------|----------------------------------------|-----------------------------------------------|-----------------|------------------|----------------------------|
|                                                                           |                            |                                                                                     | Oligomer                               | Aqueous solvent                               | Organic solvent | Process duration | Final morphology           |
| Aniline dimer ( <i>N</i> -phenyl-1,4-phenylenediamine)                    |                            | 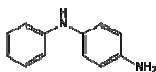   | 2 mg                                   | 4 mL 0.1 M HCl (aq.)                          | 1 mL ethanol    | 10 days          | Nanofibers/<br>nanowires   |
| Phenyl-capped aniline dimer ( <i>N,N'</i> -diphenyl-1,4-phenylenediamine) |                            |    | 2 mg                                   | 4 mL 1 M HCl (aq.)                            | 1 mL methanol   | 15 days          | Nanowires/<br>nanoplates   |
| Aniline tetramer                                                          | Ph/NH <sub>2</sub><br>TANI |  | 2 mg                                   | 4 mL 0.1 M HCl (aq.)                          | 1 mL ethanol    | 4 days           | Nanowires                  |
|                                                                           |                            |                                                                                     | 2 mg                                   | 4 mL 1 M HNO <sub>3</sub> (aq.)               | 1 mL ethanol    | 4 days           | Nanoribbons                |
|                                                                           |                            |                                                                                     | 2 mg                                   | 4 mL 0.5 M HClO <sub>4</sub> (aq.)            | 1 mL ethanol    | 4 days           | Nanoplates                 |
|                                                                           |                            |                                                                                     | 2 mg                                   | 4 mL 1 M H <sub>2</sub> SO <sub>4</sub> (aq.) | 1 mL ethanol    | 4 days           | Nanoflowers                |
|                                                                           |                            |                                                                                     | 2 mg                                   | 4 mL 1 M CSA (aq.)                            | 1 mL ethanol    | 4 days           | Inter-connected nanofibers |
| Phenyl-capped aniline tetramer                                            | Ph/Ph<br>TANI              |  | 2 mg                                   | 4 mL 0.1 M HCl (aq.)                          | 1 mL ethanol    | 5 days           | Nanowires/<br>nanoribbons  |
| Phenyl-capped aniline octamer                                             | Ph/Ph<br>OANI              |  | 2 mg                                   | 4 mL 0.1 M HCl (aq.)                          | 1 mL ethanol    | 4 days           | Agglomerates               |

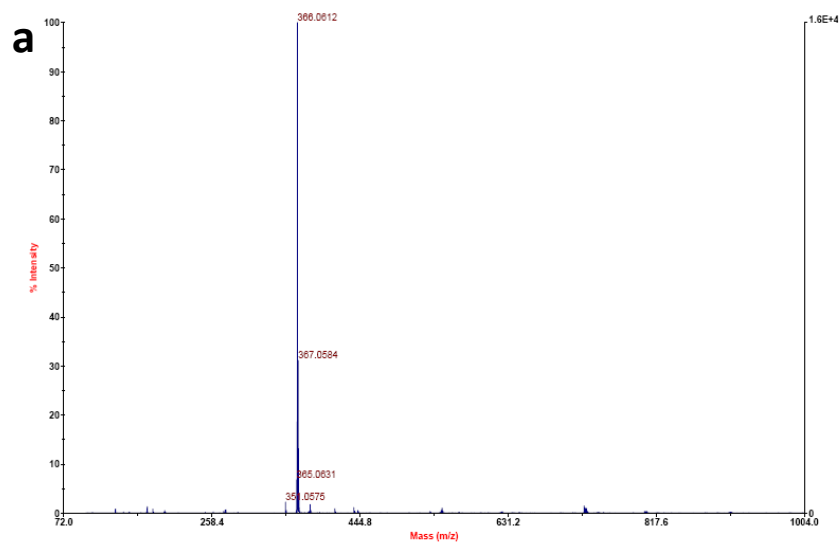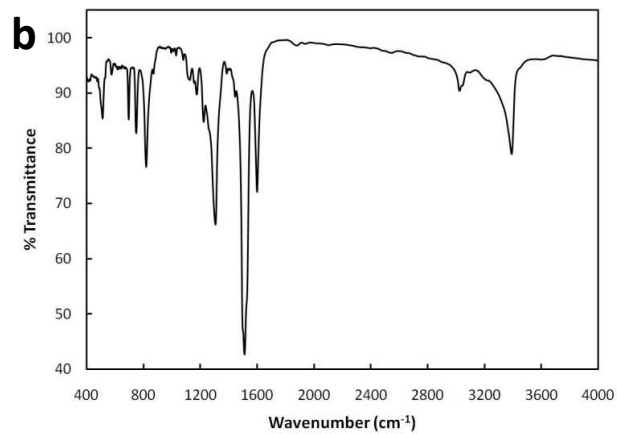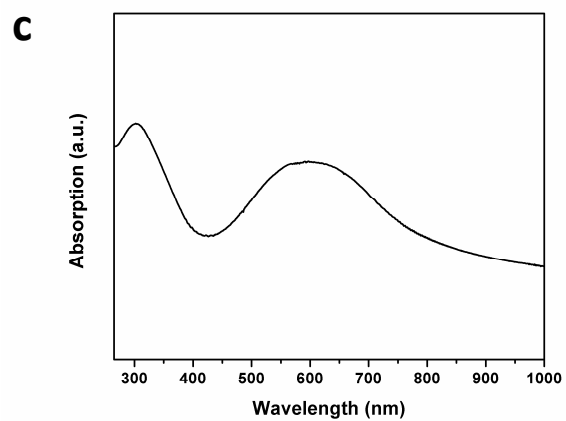

**Figure S1.** (a) MALDI, (b) FT-IR, and (c) UV-vis spectra of tetraaniline in its emeraldine base oxidation state. The UV-vis spectrum for tetraaniline is presented in the main text (Fig. 1c).

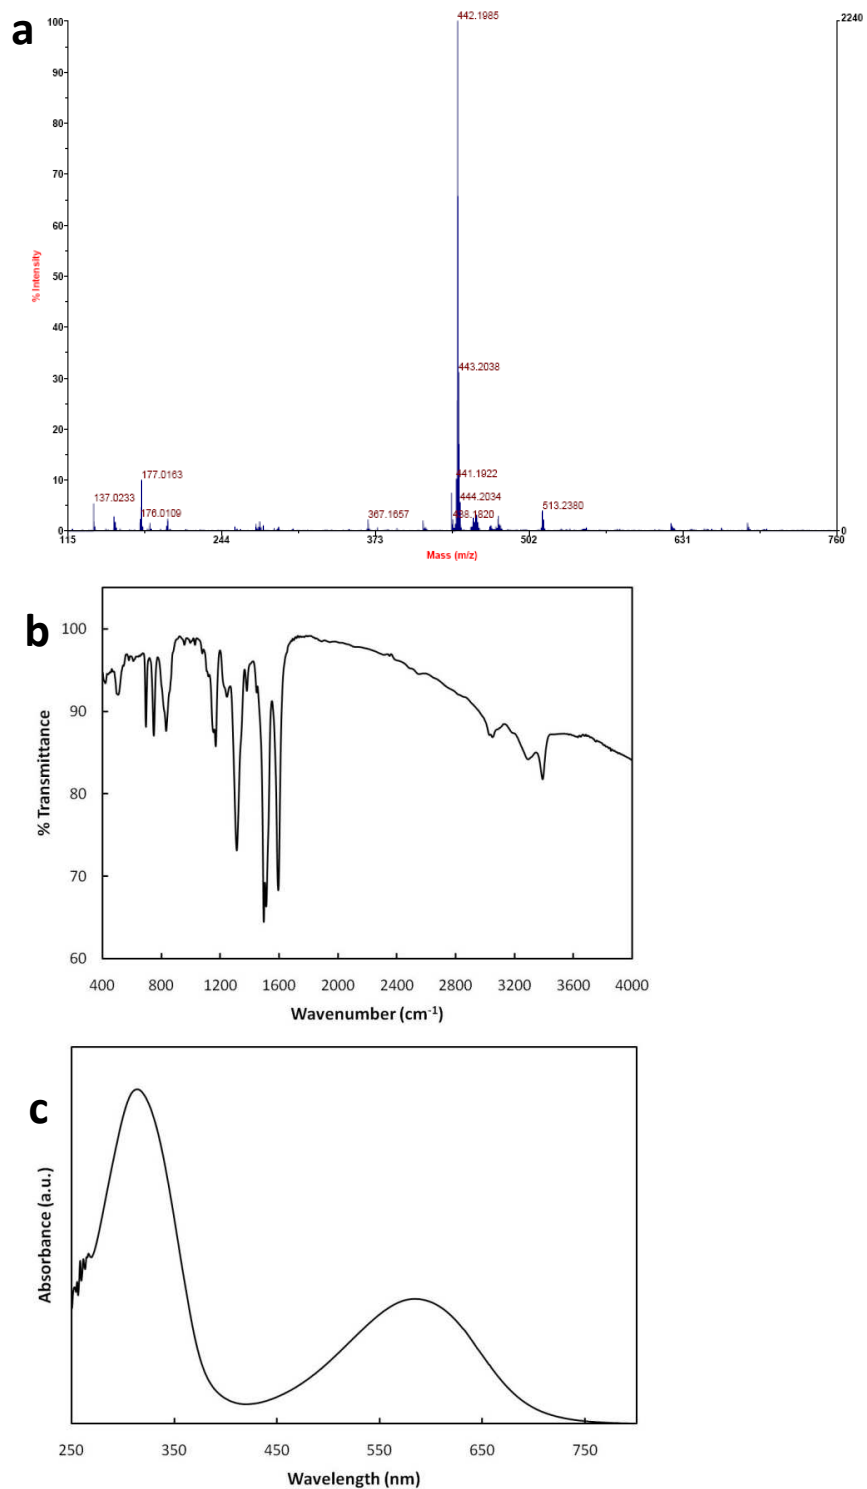

**Figure S2.** (a) MALDI, (b) FT-IR, and (c) UV-vis spectra of phenyl-capped tetraaniline in its emeraldine base oxidation state. The UV-vis spectrum was taken in ethanol.

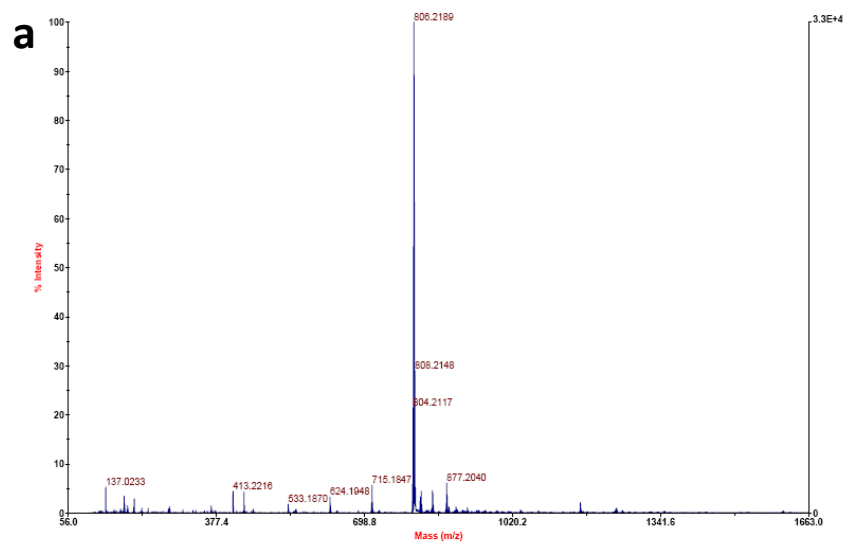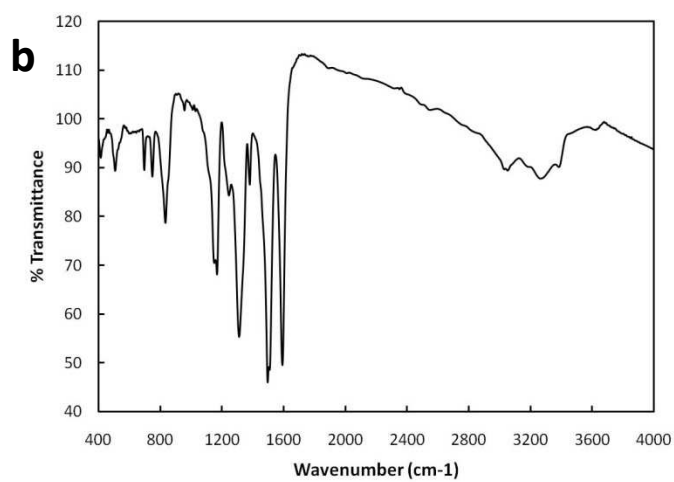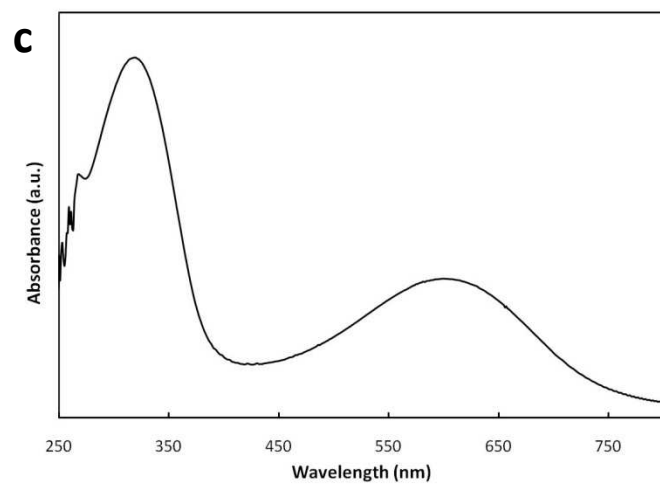

**Figure S3.** (a) MALDI, (b) FT-IR, and (c) UV-vis spectra of phenyl-capped octaaniline in its emeraldine base oxidation state. The UV-vis spectrum was taken in dimethylformamide (DMF).

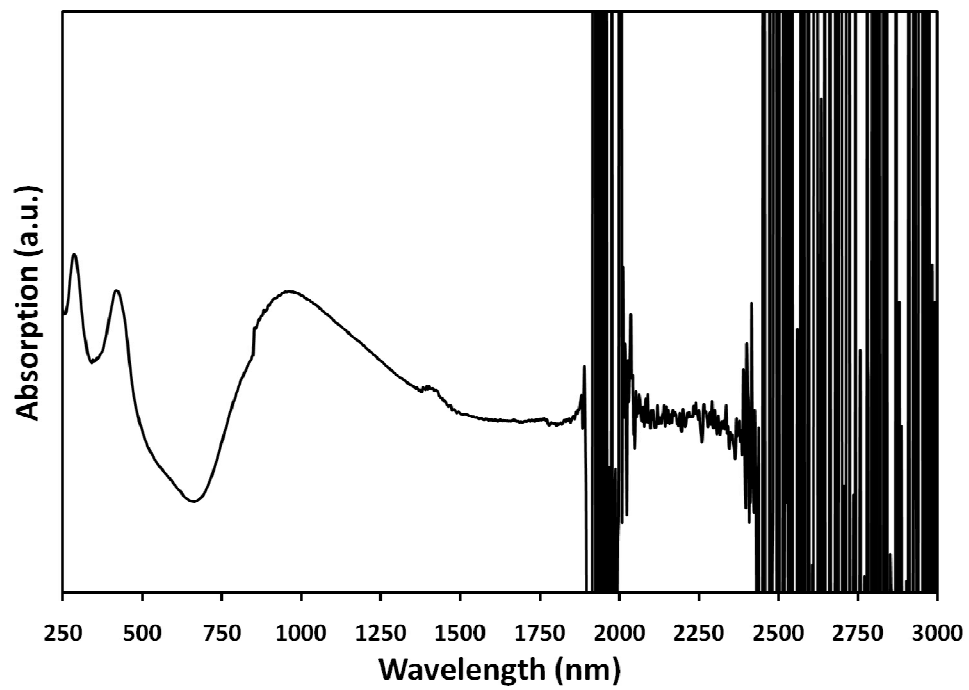

**Figure S4.** UV-vis-NIR spectrum of tetraaniline nanowires dispersed in water. The spectrum saturates beyond 1800 nm due to water absorption.

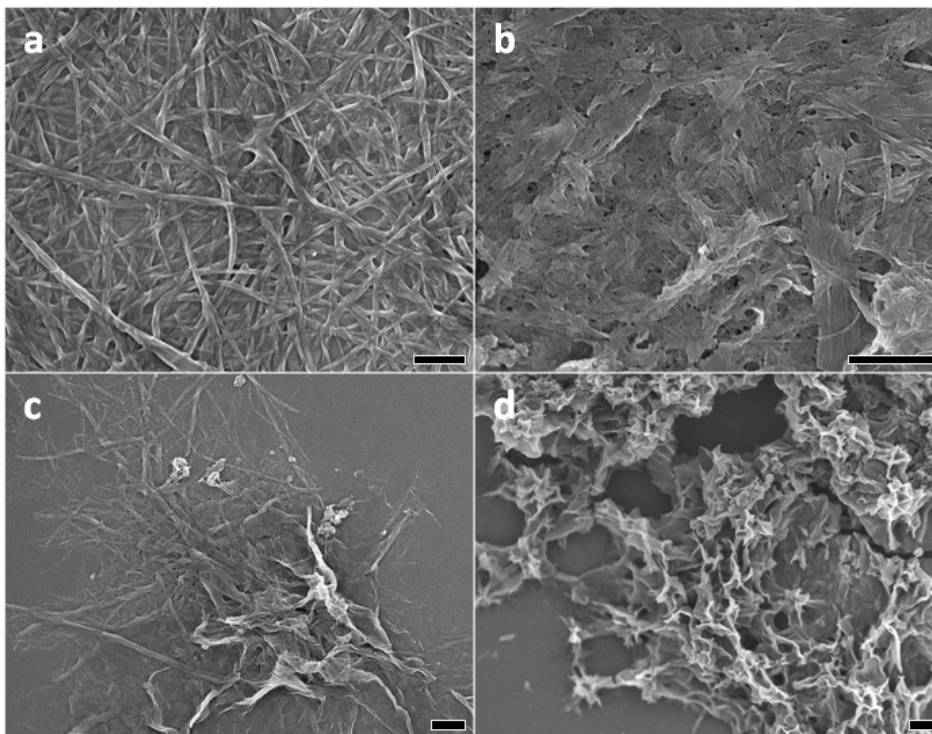

**Figure S5.** SEM images of tetraaniline that has undergone the same self-assembly process in (a) 0.1 M HCl, (b) 1.0 M HNO<sub>3</sub>, (c) 0.5 M HClO<sub>4</sub>, and (d) 1.0 M H<sub>2</sub>SO<sub>4</sub> in the absence of any organic solvent. Only poorly defined and interconnected structures are obtained, illustrating the importance of the solvation factor attributed to ethanol in our process.

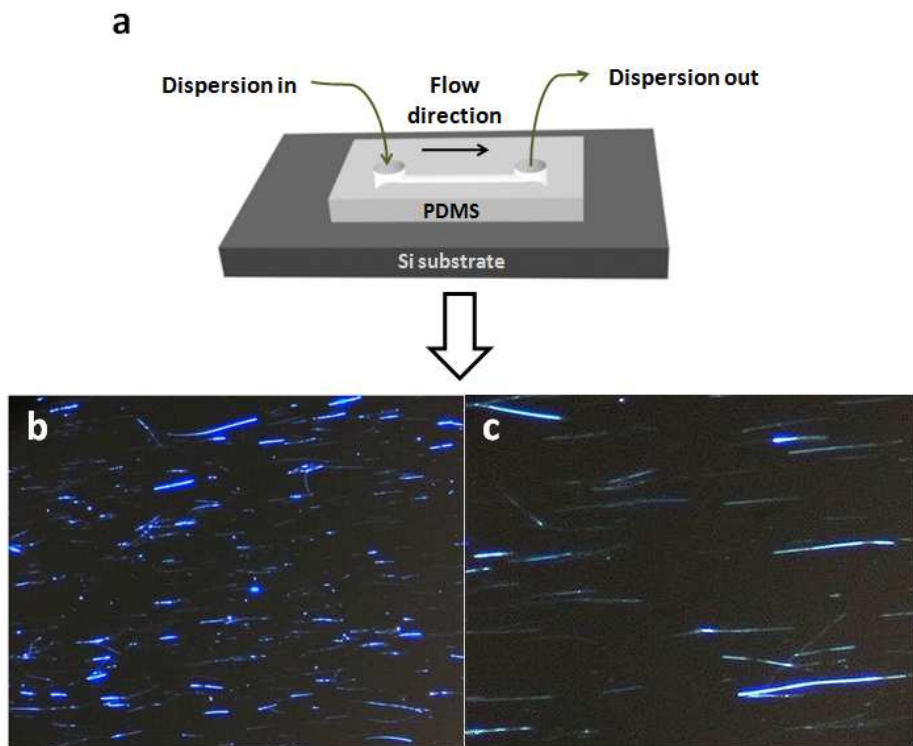

**Figure S6.** Schematic illustration of the microfluidic flow channel structure used to produce aligned nanofibers. (a) A thin rectangular cavity was cut into one side of a PDMS stamp. This created a channel when the stamp was brought into contact with a flat piece of a Si wafer. A dispersion of tetraaniline nanowires in an ethanol/water solvent mixture was then passed through the channel. (b) A dark field optical micrograph shows that the tetraaniline nanowires are aligned on the substrate under the flow channel. (c) A dark field optical micrograph shows a closer view of a selected area from (b).
